# Supplementary material for: Coumarin Derivatives as New Toxic Compounds to Selected K12, R1–R4 E. coli Strains
Source: MDPI journal article supplement (doi:10.3390/ma13112499), 2020-05-30
Supplement: s1 [file s1]

Supplementary materials

# Coumarin Derivatives as New Toxic Compounds to Selected K12, R1–R4 *E. coli* Strains

Paweł Kowalczyk <sup>1,\*</sup>, Arleta Madej <sup>2</sup>, Daniel Paprocki <sup>2</sup>, Mateusz Szymczak <sup>3</sup> and Ryszard Ostaszewski <sup>2</sup>

<sup>1</sup> Department of Animal Nutrition, The Kielanowski Institute of Animal Physiology and Nutrition, Polish Academy of Sciences, Instytutcka 3, 05-110 Jabłonna, Poland

<sup>2</sup> Institute of Organic Chemistry, Polish Academy of Sciences, Kasprzaka 44/52, 01-224 Warsaw, Poland; arleta.madej@icho.edu.pl (A.M.); dpaprockizolw@gmail.com (D.P.); rysard.ostaszewski@icho.edu.pl (R.O.)

<sup>3</sup> Department of Molecular Virology, Institute of Microbiology, Faculty of Biology, University of Warsaw, Miecznikowa 1, 02-096 Warsaw, Poland; mszymczak@biol.uw.edu.pl; ORCID: 0000-0003-4056-7792

\* Correspondence: [p.kowalczyk@ifzz.pl](mailto:p.kowalczyk@ifzz.pl); ORCID: 0000-0003-4025-3750

Received: 23 April 2020; Accepted: 27 May 2020; Published: 30 May 2020

| Number in the Table | Compound                                                                             | Molar Mass [g/mol] |
|---------------------|--------------------------------------------------------------------------------------|--------------------|
| 1                   | 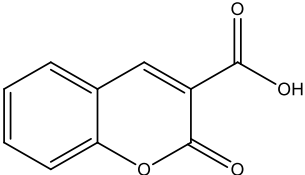   | 190.15             |
| 2                   |  | 218.21             |
| 3                   |  | 391.54             |
| 4                   |  | 521.64             |
| 5                   |  | 566.64             |

|    |                                                                                      |        |
|----|--------------------------------------------------------------------------------------|--------|
| 6  | 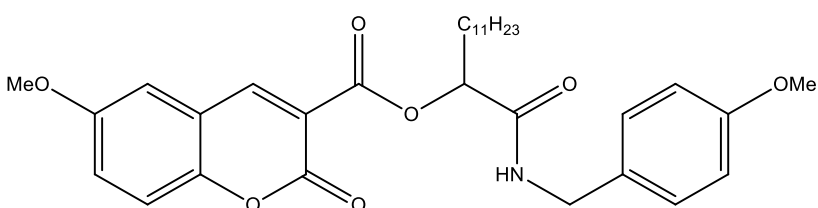   | 551.67 |
| 7  |    | 535.67 |
| 8  |    | 491.62 |
| 9  |   | 457.60 |
| 10 |  | 483.64 |
| 11 |  | 487.59 |
| 12 |  | 465.54 |

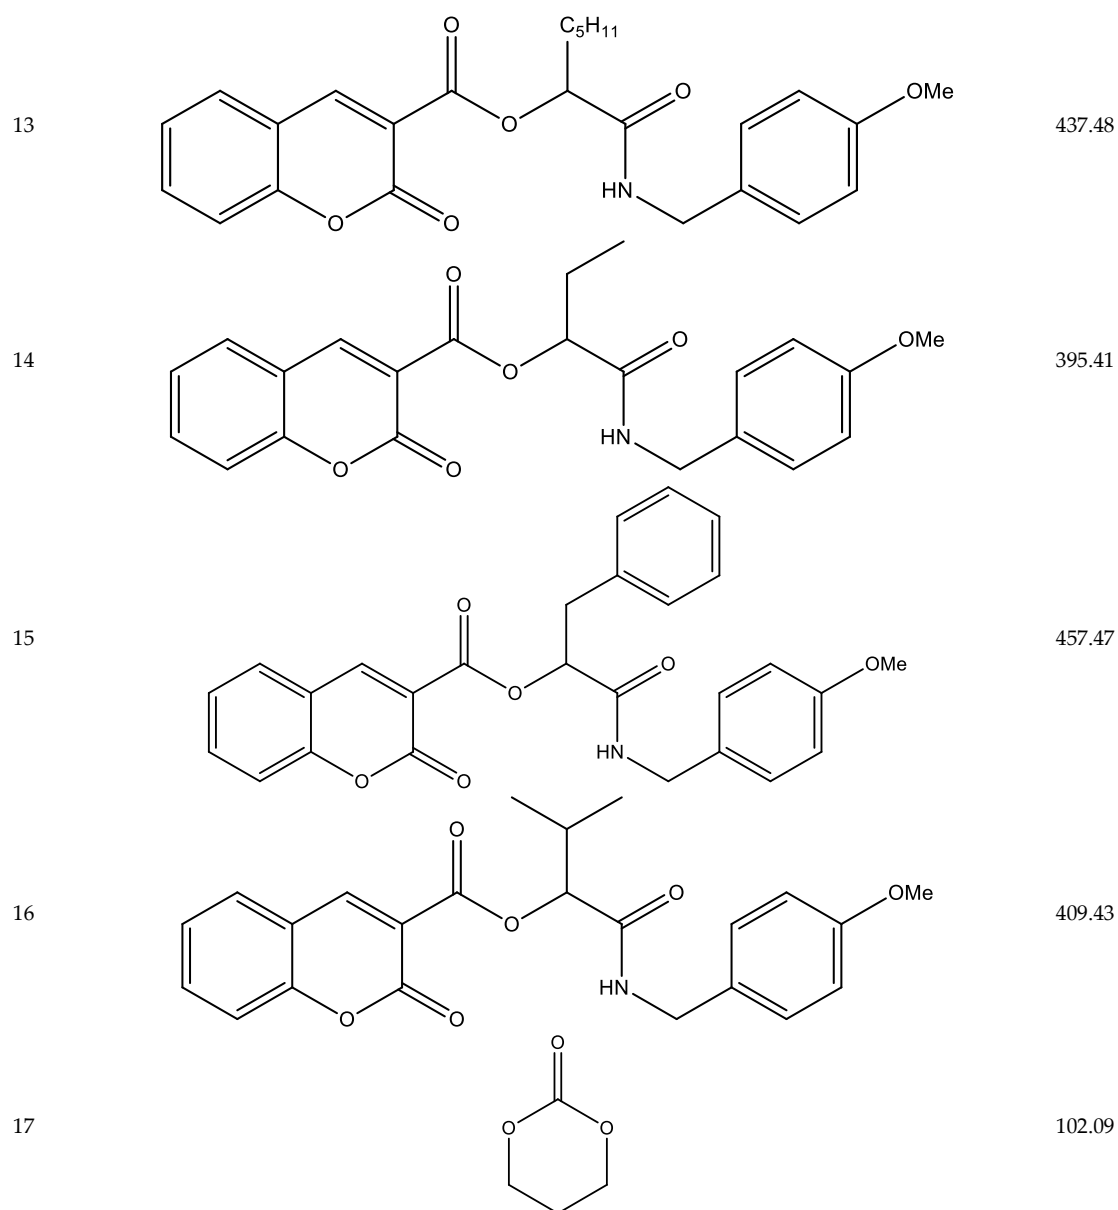

**Figure S1.** Structural formulas of coumarin derivatives.

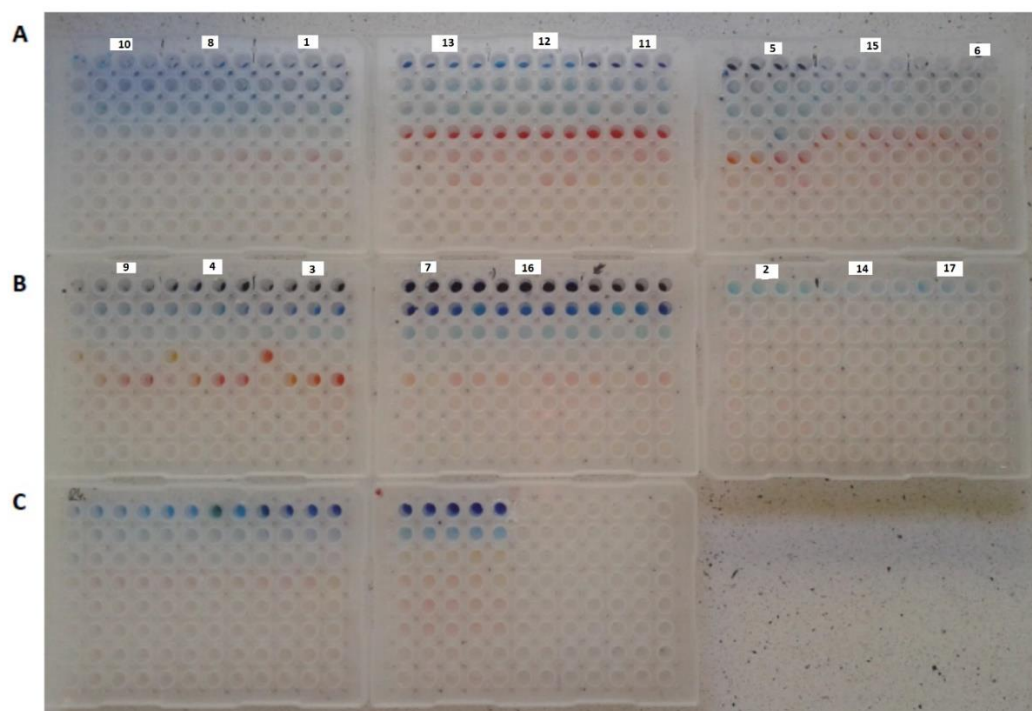

**Figure S2.** An example of the analysis of test compounds of various concentrations using a resusarin dye on microplates ( $\text{mg L}^{-1}$ ). Panel A strains K12, R1, R2, R3 (with tested first 1–9 compounds). Panel B strains K12, R1, R2, R3 with tested 8 compounds (from 10 to 17). Number 18–control dilution. Panel C R4 strain with all 17 peptidomimetics. The order in which the compounds were applied to the plate was as follows in Table 1.
